# Supplementary material
Source: MDPI journal article supplement (https://www.mdpi.com/2673-8236/2/1/4)
Supplement: s1 [file s1]

Archive with 1 entries (1 files):
- kidneydial-1484829-supplementary.pdf
